# Supplementary material for: Determining association constants from titration experiments in supramolecular chemistry
Source: Royal Society of Chemistry journal article supplement (doi:10.1039/c0cs00062k), 2010-12-02
Supplement: c0cs00062k.zip [file c0cs00062k.zip]

## Sheet: Sheet1
Host concentration / M	Guest concentration / M	437 nm	435 nm	423 nm	421 nm
2.3e-06	0	0.26098	0.3853	0.356	0.27278
2.3e-06	9.76934e-08	0.26545	0.39099	0.35341	0.26975
2.3e-06	1.94919e-07	0.26386	0.38865	0.35317	0.27121
2.3e-06	2.91679e-07	0.26403	0.39075	0.35359	0.27016
2.3e-06	3.87977e-07	0.26361	0.39165	0.35274	0.26987
2.3e-06	5.31566e-07	0.26541	0.3908	0.35151	0.26985
2.3e-06	6.74135e-07	0.26423	0.39181	0.35186	0.26982
2.3e-06	8.62659e-07	0.26531	0.39043	0.35092	0.26861
2.3e-06	1.04941e-06	0.26513	0.39155	0.34922	0.26768
2.3e-06	1.23442e-06	0.2646	0.39252	0.34837	0.26637
2.3e-06	1.41771e-06	0.26486	0.39324	0.34819	0.2657
2.3e-06	1.59931e-06	0.2662	0.39393	0.34741	0.26692
2.3e-06	1.77923e-06	0.26716	0.39422	0.34707	0.26609
2.3e-06	1.9575e-06	0.26769	0.39527	0.34452	0.26512
2.3e-06	2.13414e-06	0.26797	0.39594	0.34514	0.26385
2.3e-06	2.30918e-06	0.2689	0.39664	0.34416	0.26312
2.3e-06	2.48263e-06	0.27002	0.39687	0.34321	0.26305
2.3e-06	2.65452e-06	0.26804	0.39699	0.3432	0.26246
2.3e-06	2.82488e-06	0.27085	0.39844	0.34292	0.26334
2.3e-06	2.99371e-06	0.27013	0.39808	0.34322	0.26331
2.3e-06	3.16104e-06	0.27147	0.3989	0.34186	0.26104
2.3e-06	3.32689e-06	0.27141	0.40001	0.3409	0.26142
2.3e-06	3.49128e-06	0.27191	0.40009	0.34066	0.26117
2.3e-06	3.65423e-06	0.27241	0.4007	0.34053	0.26123
2.3e-06	3.89599e-06	0.27374	0.40106	0.33902	0.25803
2.3e-06	4.13462e-06	0.27464	0.40271	0.33715	0.25697
2.3e-06	4.37016e-06	0.27408	0.40145	0.33627	0.25809
2.3e-06	4.67954e-06	0.27642	0.40569	0.33465	0.25632
2.3e-06	4.98369e-06	0.27457	0.40323	0.33574	0.25673
2.3e-06	5.43038e-06	0.27657	0.40459	0.33272	0.25507
2.3e-06	5.86603e-06	0.2764	0.40337	0.33348	0.25516
2.3e-06	6.43041e-06	0.27879	0.40689	0.33034	0.25332
2.3e-06	6.97678e-06	0.28427	0.41088	0.32796	0.24908
2.3e-06	7.63568e-06	0.2839	0.41246	0.32443	0.24742
2.3e-06	8.2693e-06	0.286	0.41283	0.32313	0.24586
2.3e-06	9.11659e-06	0.28717	0.41672	0.32131	0.24417
2.3e-06	1.02529e-05	0.28925	0.41891	0.31824	0.2418
2.3e-06	1.13102e-05	0.29129	0.42168	0.31408	0.23867
2.3e-06	1.22964e-05	0.29566	0.42505	0.31034	0.23501
2.3e-06	1.36574e-05	0.2985	0.43041	0.30652	0.23186
2.3e-06	1.63867e-05	0.29904	0.43008	0.30433	0.23098
2.3e-06	2.18427e-05	0.30883	0.4416	0.29391	0.22196
2.3e-06	3.00201e-05	0.32151	0.45763	0.27599	0.20684
2.3e-06	4.09112e-05	0.33313	0.47382	0.26008	0.19353
2.3e-06	5.17884e-05	0.34933	0.49346	0.23883	0.17668
2.3e-06	6.26517e-05	0.33375	0.47404	0.25895	0.19355
2.3e-06	7.89207e-05	0.34916	0.49399	0.23897	0.17674
2.3e-06	0.000116761	0.36668	0.51892	0.21264	0.15407
2.3e-06	0.000143687	0.37205	0.5209	0.20626	0.14997
2.3e-06	0.000181239	0.38635	0.54237	0.18663	0.134
2.3e-06	0.000229278	0.37728	0.5335	0.19658	0.14095
2.3e-06	0.000282334	0.39059	0.54867	0.17759	0.12705
2.3e-06	0.000335057	0.39685	0.55612	0.16886	0.11993
2.3e-06	0.000439517	0.39647	0.55521	0.16738	0.11808
2.3e-06	0.000593786	0.39852	0.55843	0.16411	0.11496
2.3e-06	0.000795083	0.40306	0.5594	0.16004	0.11148
2.3e-06	0.0010399	0.40281	0.56099	0.15775	0.10994
